# Supplementary material for: Rejuvenation of brain, liver and muscle by simultaneous pharmacological modulation of two signaling determinants, that change in opposite directions with age
Source: publisher site journal article supplement (doi:10.18632/aging.102148), 2019-08-15
Supplement: Supplementary file [file aging-v11i15-102148-supplementary-material-SD1.pdf]

**SUPPLEMENTARY FIGURES**

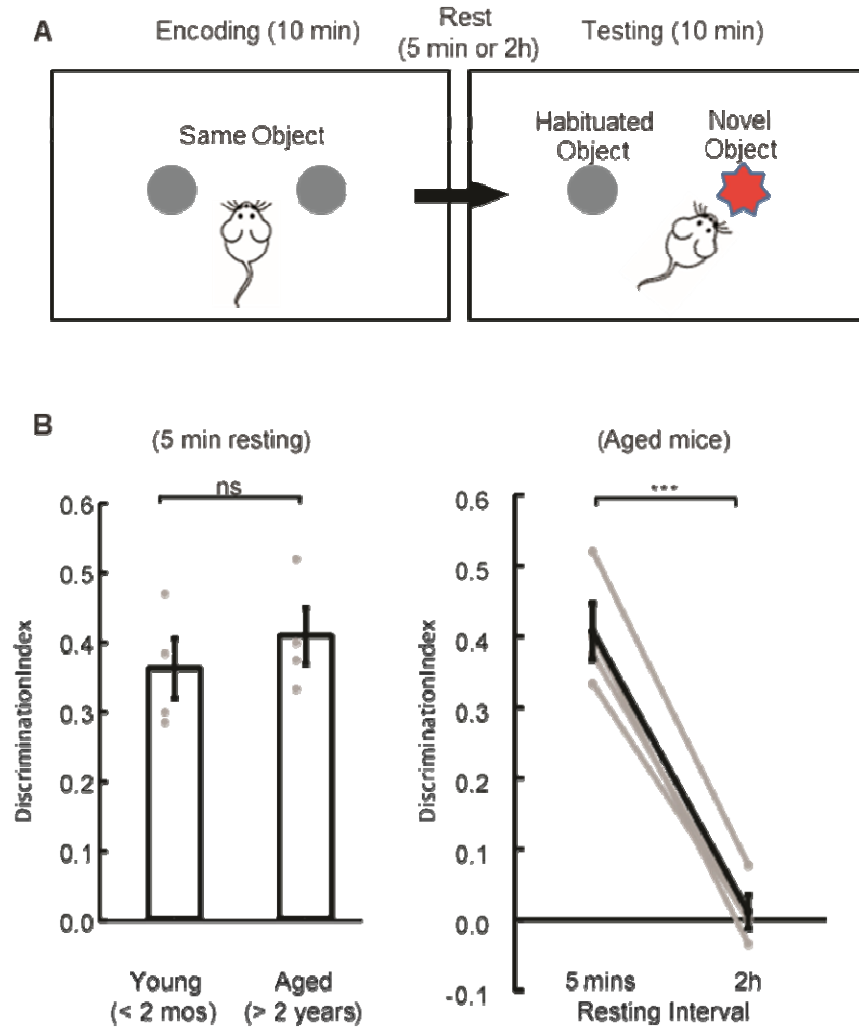

**Supplementary Figure 1. Varying resting period results in different performance of NOR test in aged mice. (A)** Schematics of the NOR test, two resting time periods were tested. **(B, C)** Aged mice perform similarly to young mice under 5 min rest **(B, p=0.455)**, but fail to recognize the novel object following 2 h rest **(C, p<0.001)**. Light grey: individual data points. Black: group average. Error bars: S.E.M. \*\*\* p<0.001.

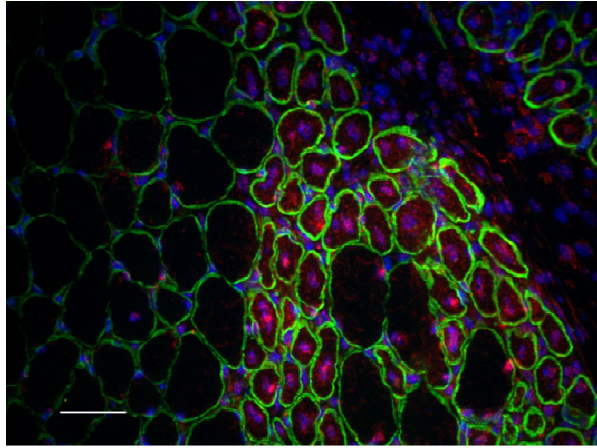

Young

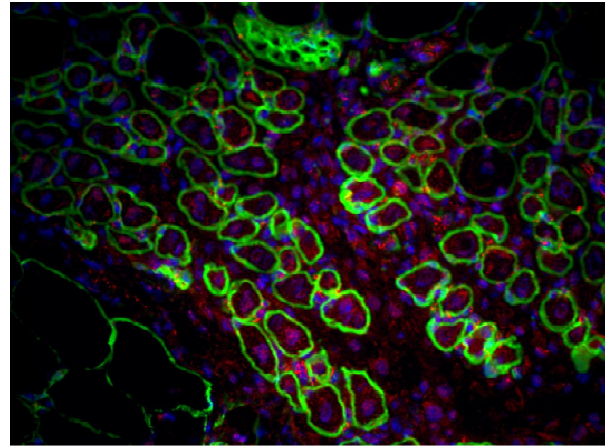

Old

**Supplementary Figure 2. Representative images of p16/laminin immunofluorescence at young and old muscle injury sites 5 days post injury.** Laminin+ (green) nascent myofibers of young and old muscle concomitantly expressing p16 (red) against Hoechst DNA dye (blue).
